# Supplementary material for: Transcriptional signatures of Zika virus infection in astrocytes
Source: PubMed Central journal article supplement (PMC7921019; doi:10.1007/s13365-020-00931-3), 2021-01-06

# Figure S1

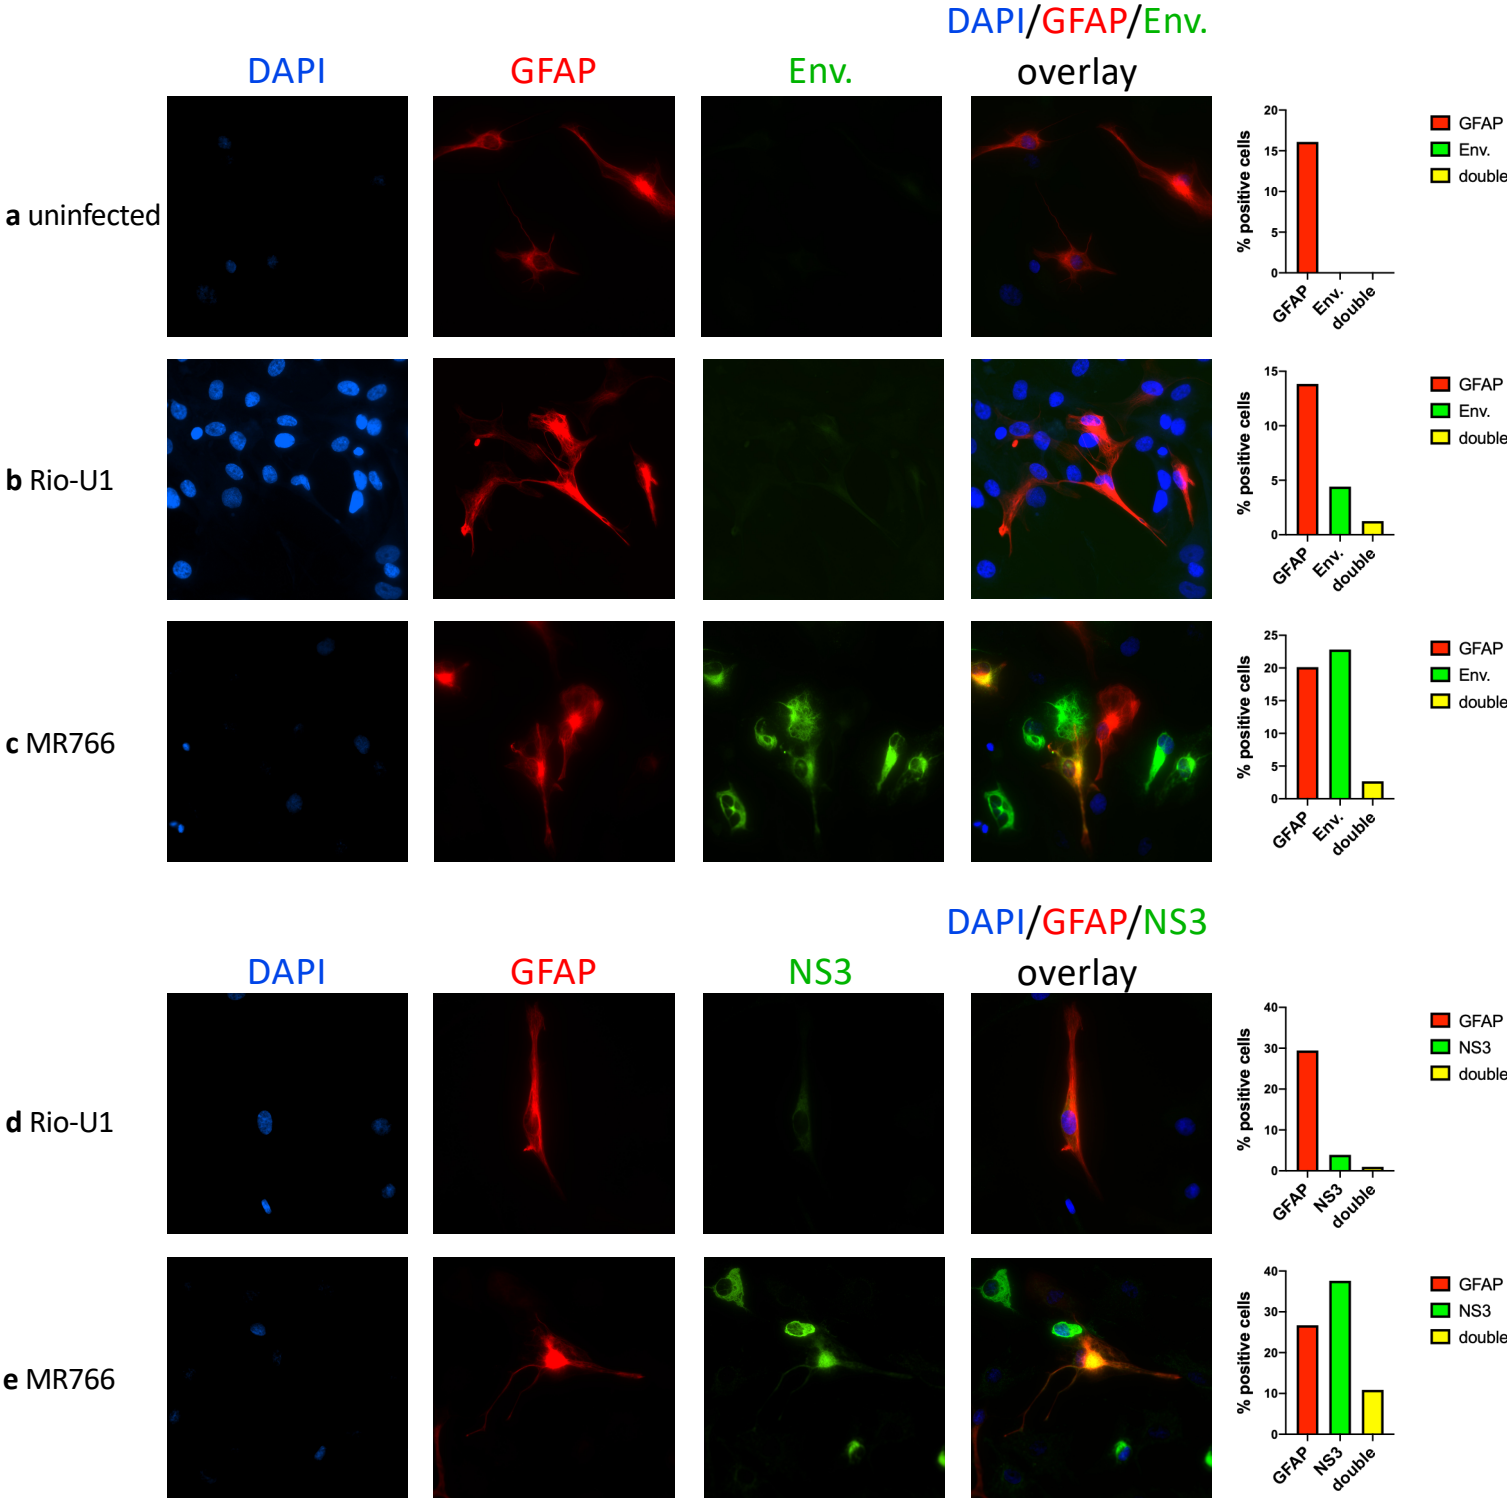

Supplement: 13365_2020_931_MOESM1_ESM.pdf [file 13365_2020_931_MOESM1_ESM.pdf]
